# Supplementary material
Source: publisher figshare collection journal article supplement (https://asha.figshare.com/articles/dataset/_/28279184)
Supplement: Supplementary file 1 [file 1]

**Supplemental Material S3.** Focus group slides: A copy of the slides shared with focus group participants.

# CVI and AAC Focus Group

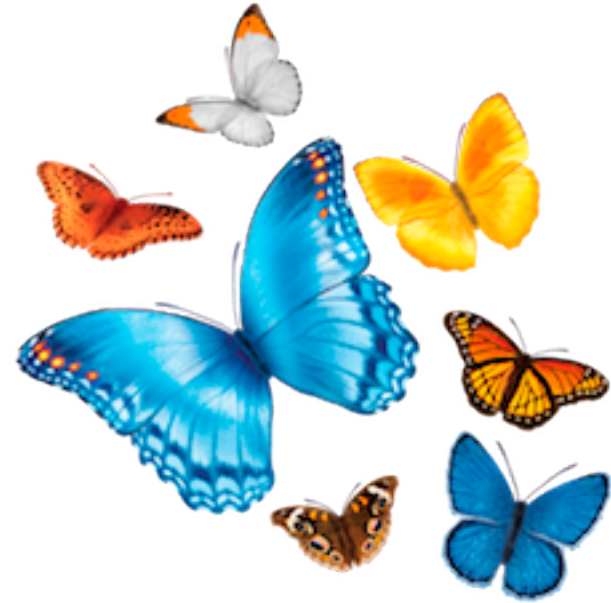

Jamie Boster, Kate Brown, Julie Potts, &  
Kevin Pitt

# Overview of AAC

- Unaided Strategies
  - Gestures, Body Movements, Facial Expression
- Aided Strategies
  - Low Tech
    - Paper Communication Boards, Picture Exchange
  - High Tech
    - Speech Generating Devices

# AAC and CVI

- AAC is highly visual
  - Visual scenes (photographs)
  - Grid Displays (array of icons)
- Need modifications to support access
- How can we better support children with CVI who use AAC?

# CVI

A neurological form of visual impairment caused by “damage or atypical structures in the visual pathways and/or visual processing centers of the brain” (Roman Lantzy, 2018)

# CVI Characteristics

- Color Preferences
- Need for Movement
- Visual Latency
- Visual Field preferences
- Difficulty with visual complexity
- Attraction to light
- Difficulty with distance viewing
- Atypical visual reflexes
- Difficulty with visual novelty
- Difficulty with visually guided reach

# Direct & Indirect Selection

- Direct Selection
  - Selection with an individual's body part
    - Hands/fingers, feet/toes, eyes
- Indirect Selection
  - Selection via a device such as a switch/button
  - Individual activates a switch to control the device

# Alternative Access

- Children with CVI who use AAC often have multiple disabilities including physical disabilities
  - Impaired Auditory system and cognition
- Eye Gaze as a Direct Selection Option
  - Child selects item with the gaze of their eyes
  - Reduces cognitive load from other access methods such as switch scanning

# Visual Supports for CVI

- Range of supports but limited research or commentary on their design
- Please consider the pros and cons of the following supports



# Roman Word Bubbling

- Intended to reduce complexity
- Emphasizing the shape of entire word

AAC and  
Cortical Visual  
Impairment

Helpful?

# Word Bubbling

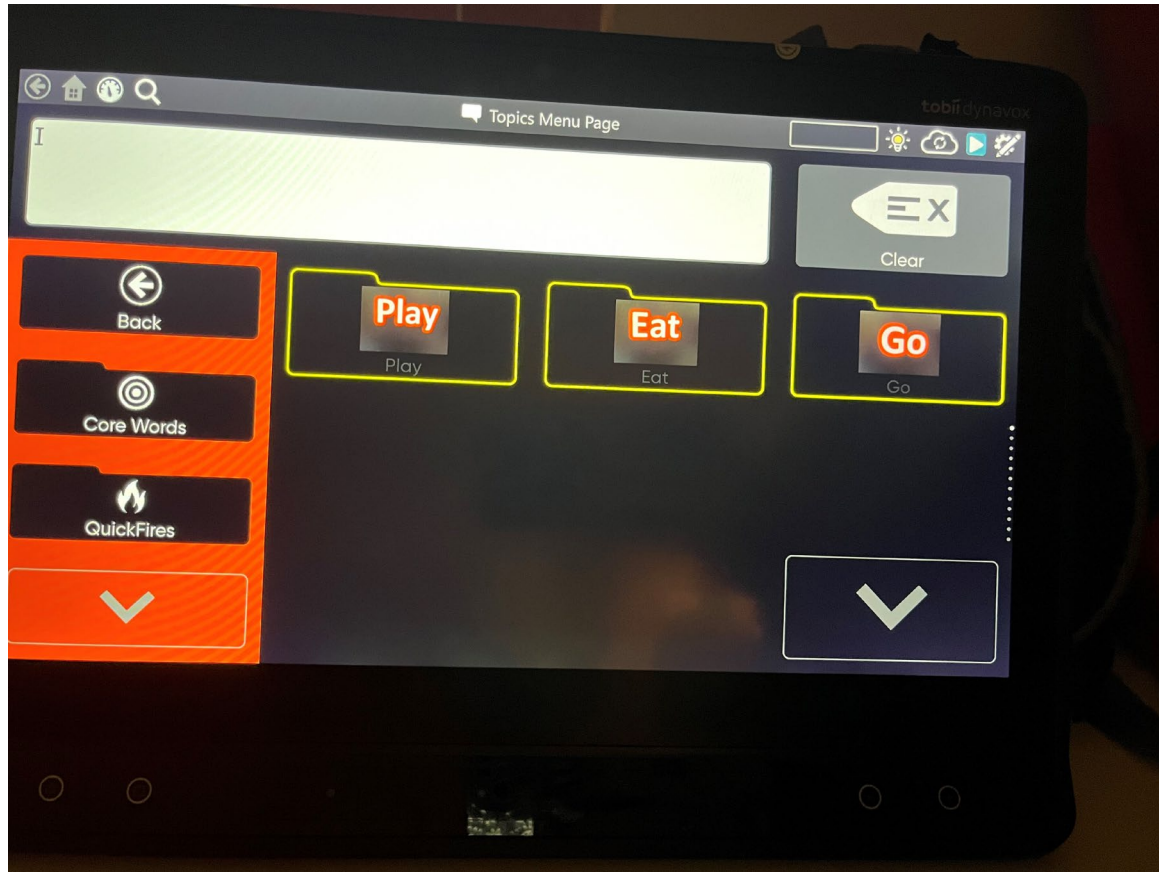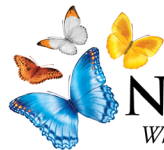

**NATIONWIDE CHILDREN'S**  
*When your child needs a hospital, everything matters.™*

# Roman Word Bubbling

- Pros of this approach?
- Cons of this approach?

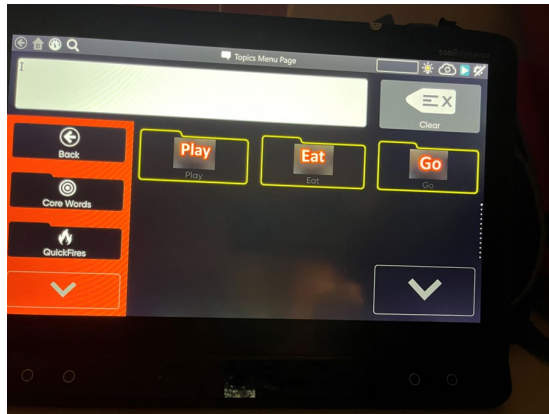

Helpful?

# Symbol Type

- Photographs

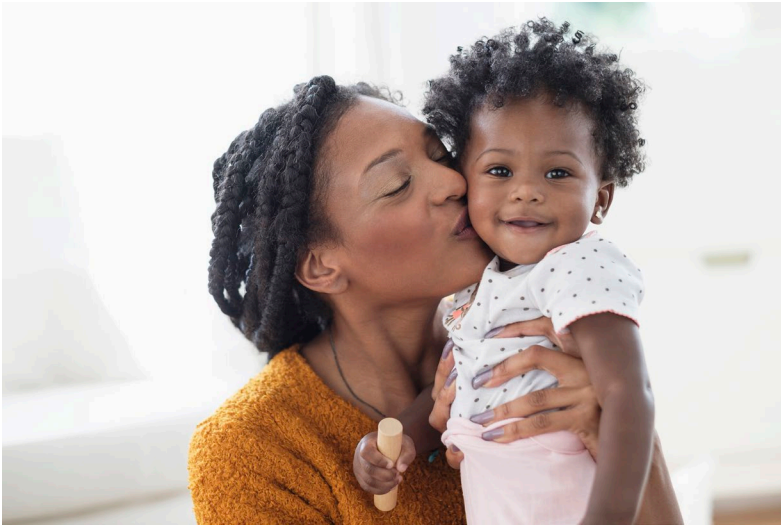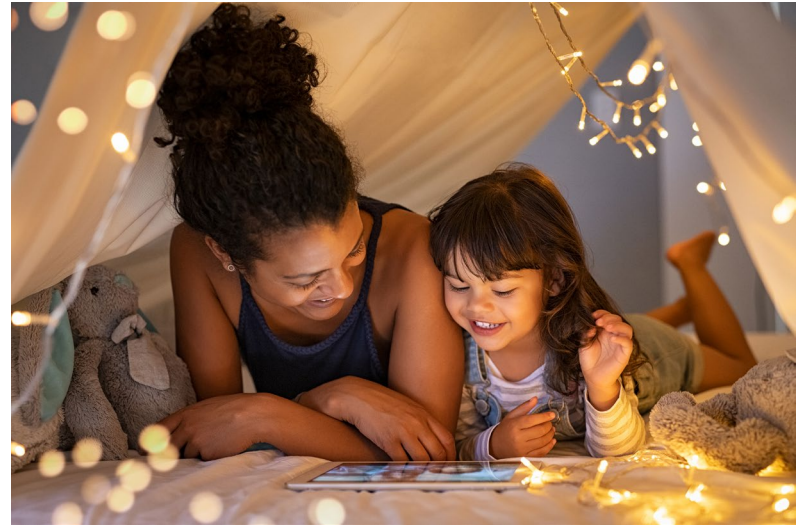

# Symbol Type

- Traditional Symbols

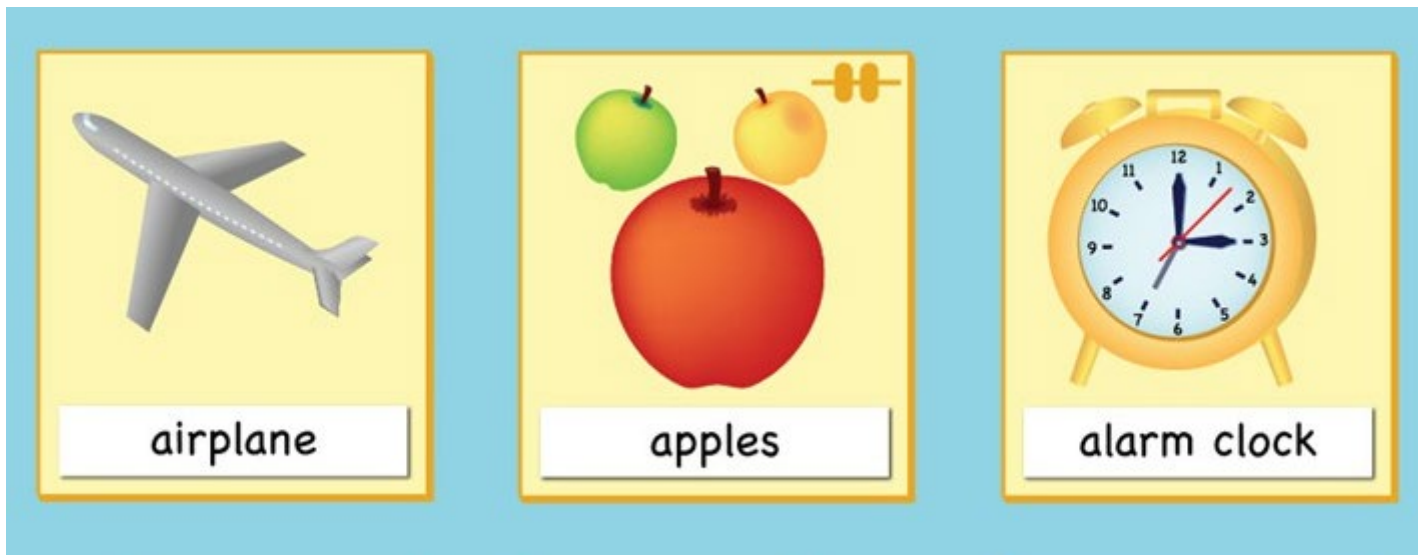

# Symbol Type

- Line Drawings (Symbol Styx)

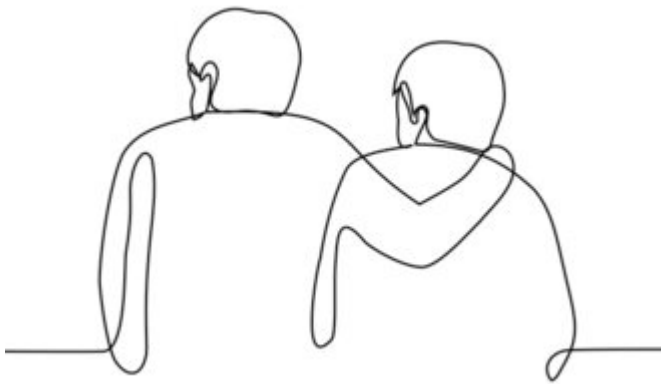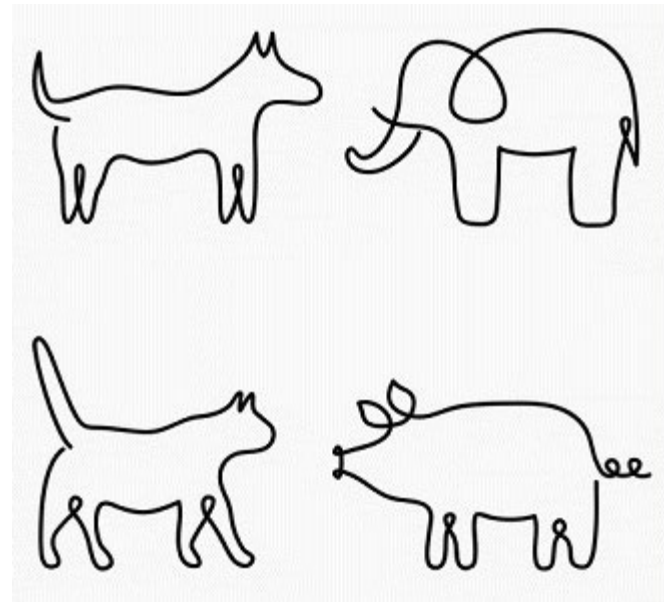

# Symbol Type

- Pros?
- Cons?
- What symbol type might be best?
- Important aspects of the symbol?
  - Colors, salient features, etc.?



# Grid Size

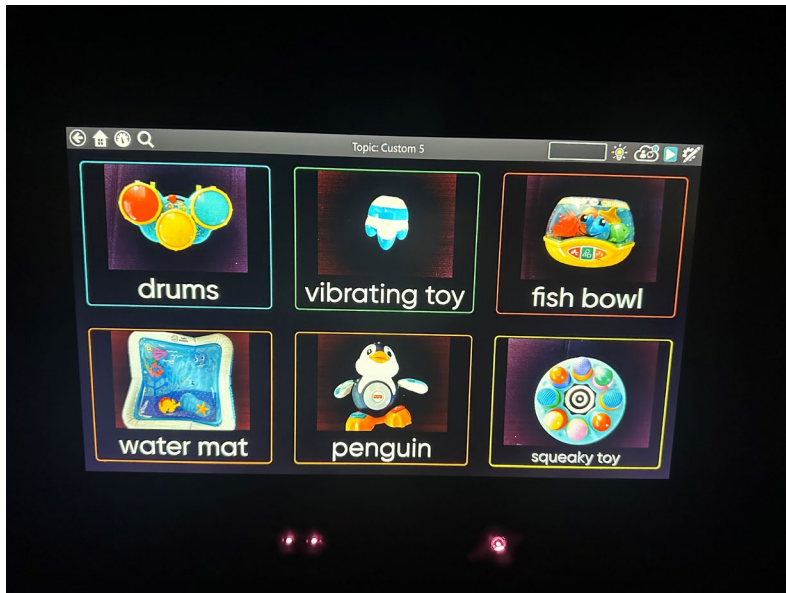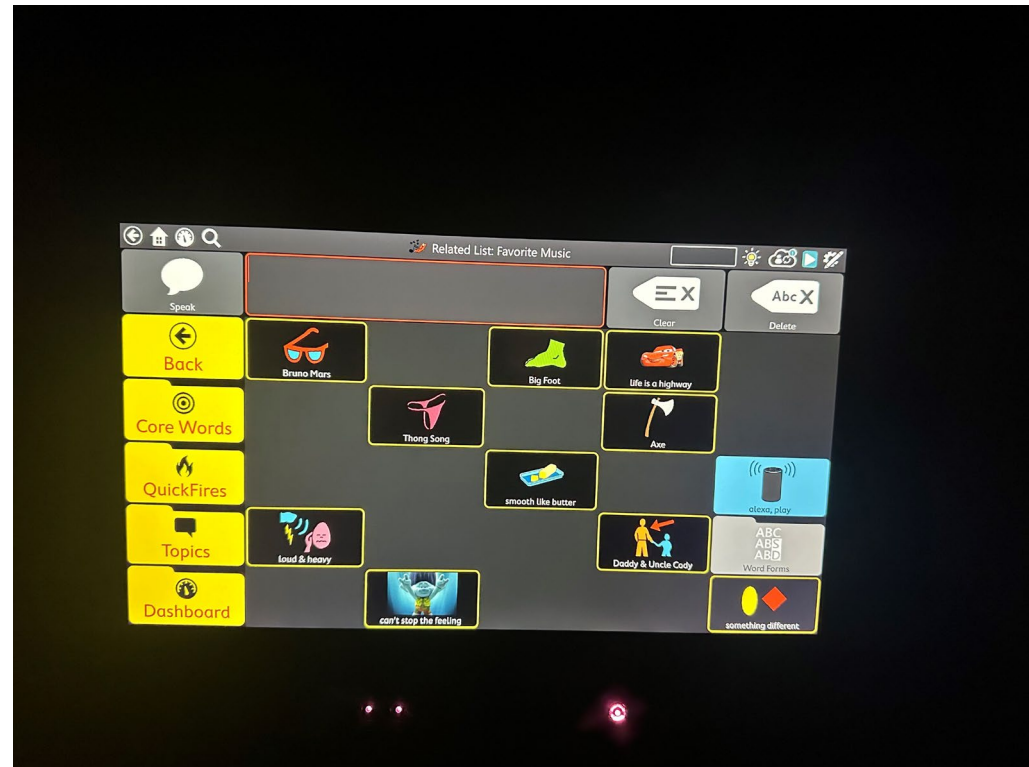



# Grid Size

- Smaller grid size
    - Pros
    - Cons
  - Larger grid size
    - Pros
    - Cons
  - Size considerations for CVI?
-

# Black Background

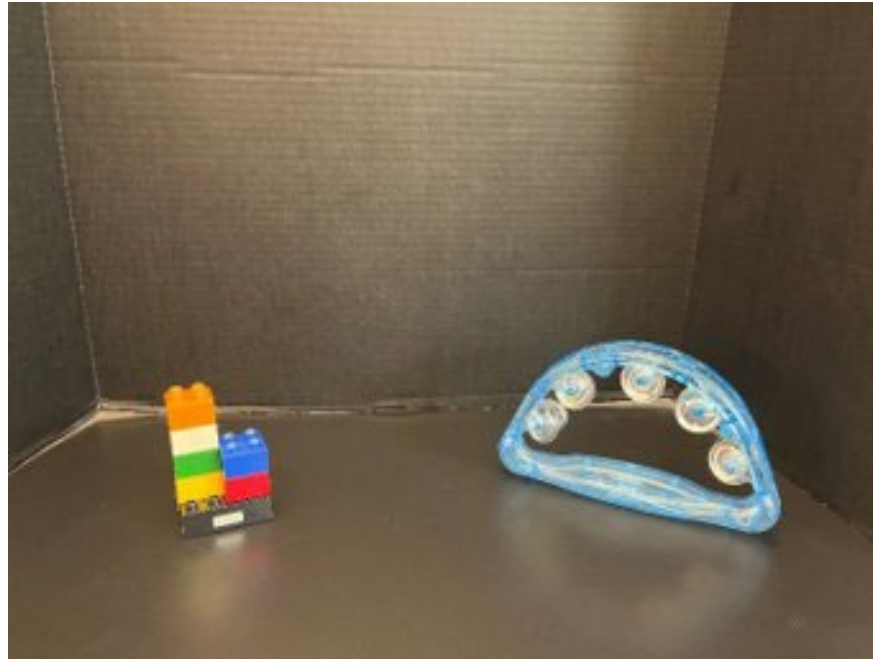

**NATIONWIDE CHILDREN'S**  
*When your child needs a hospital, everything matters.™*

# Black Background

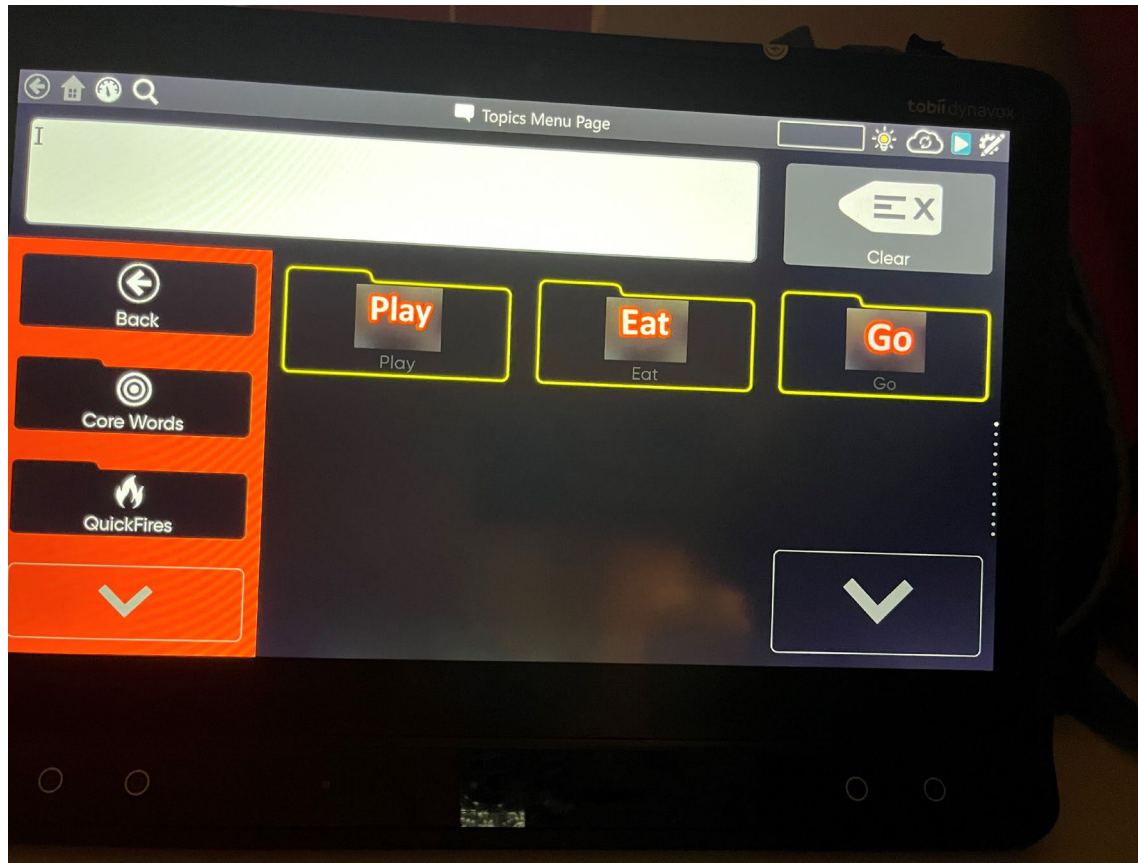

# Grey Background with Black Buttons

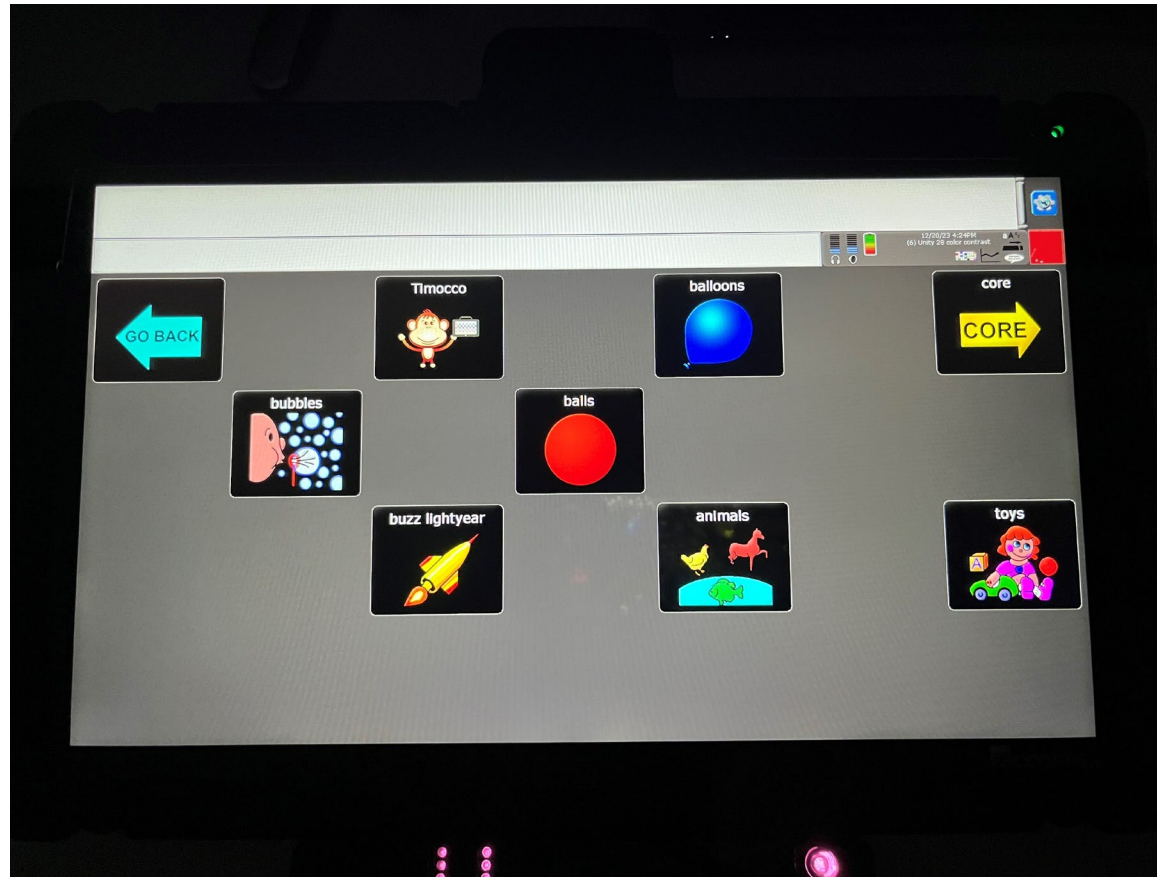

# Black Background

- Matte Screens and mirroring effect?
  - Is a black background effective?
  - Empty space leaves room for distraction
- Black buttons versus colored/grey backgrounds?

# High Contrast Symbols

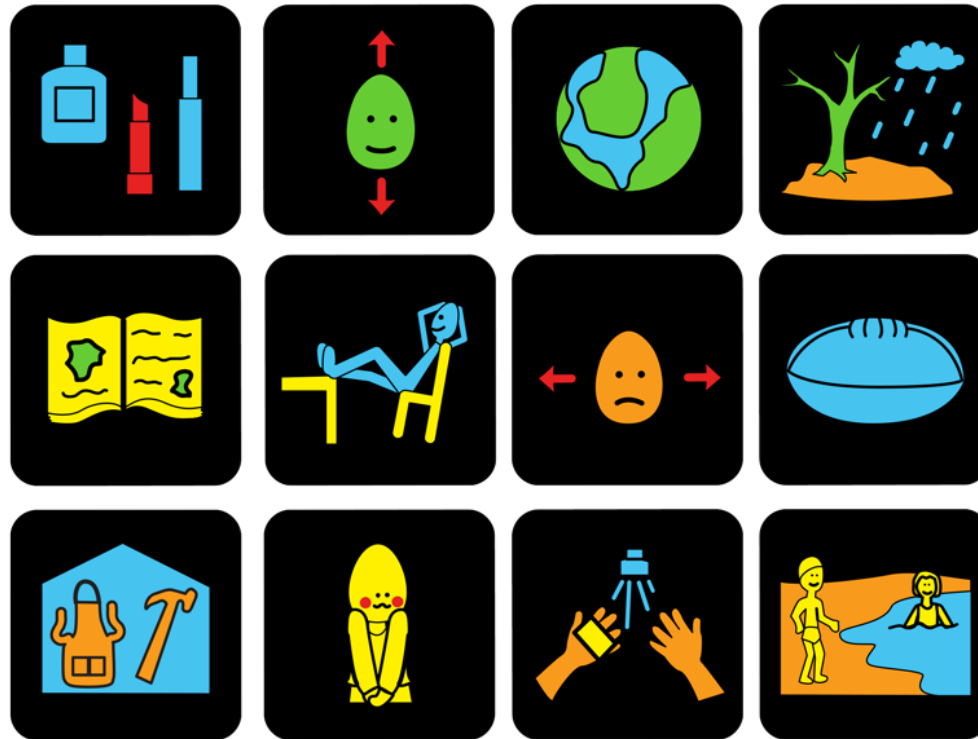

# High Contrast Symbols

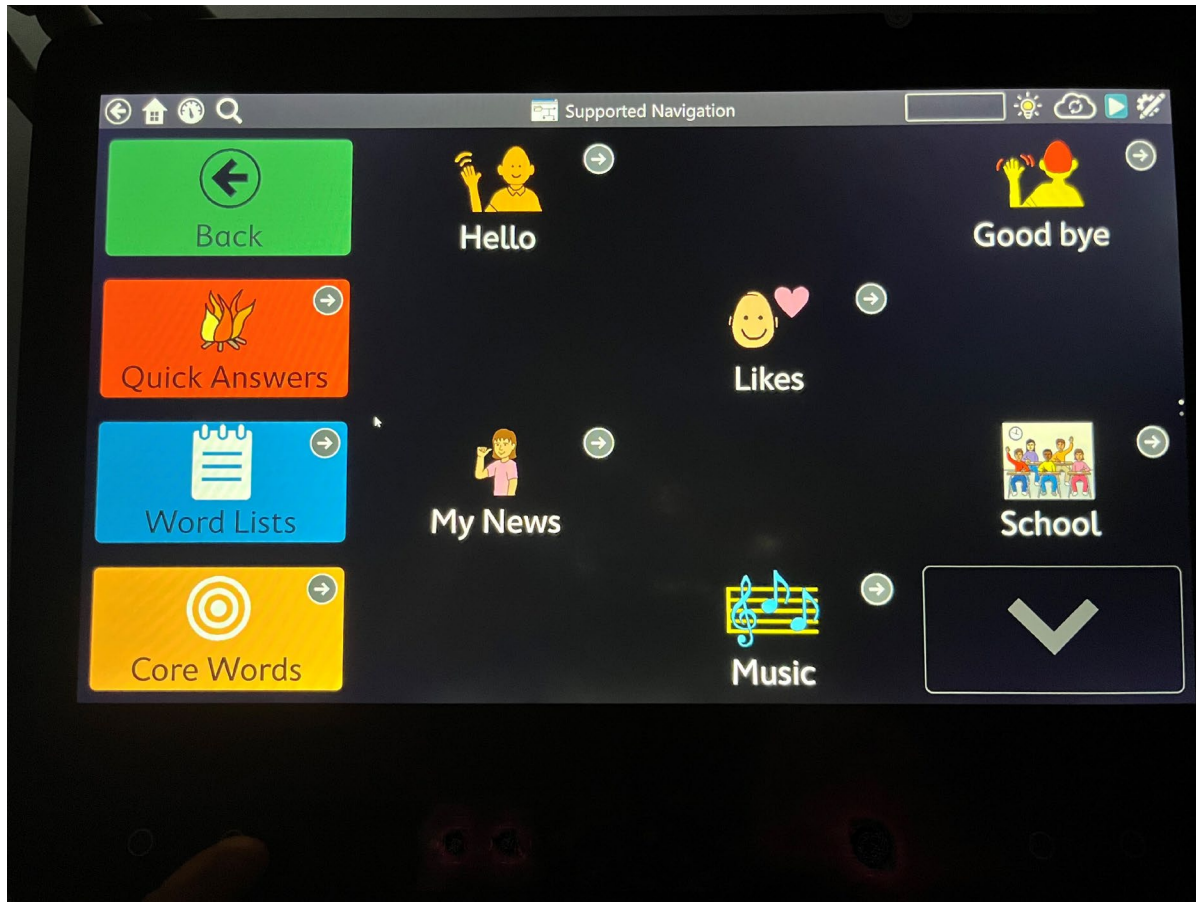

# High Contrast Symbols

- Pros?
- Cons?
- Complexity of these symbols?
  - Thoughts about design of individual symbols
- Abstract nature of these symbols?
  - Feelings for example

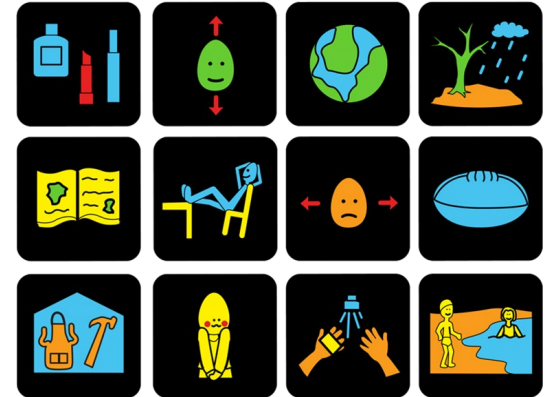



# Outlining in Color

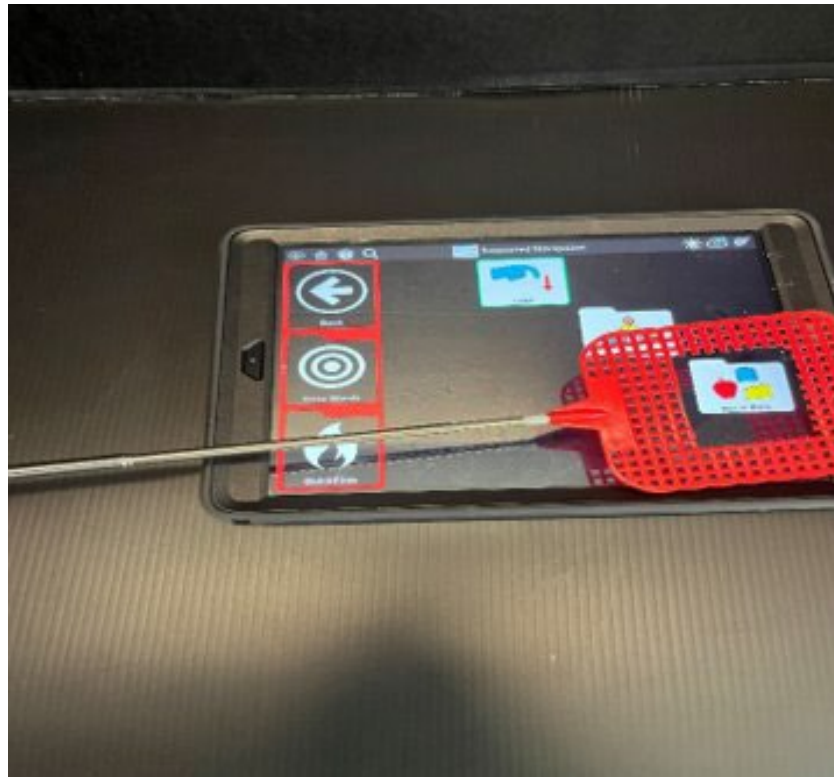

# Outlining in Color

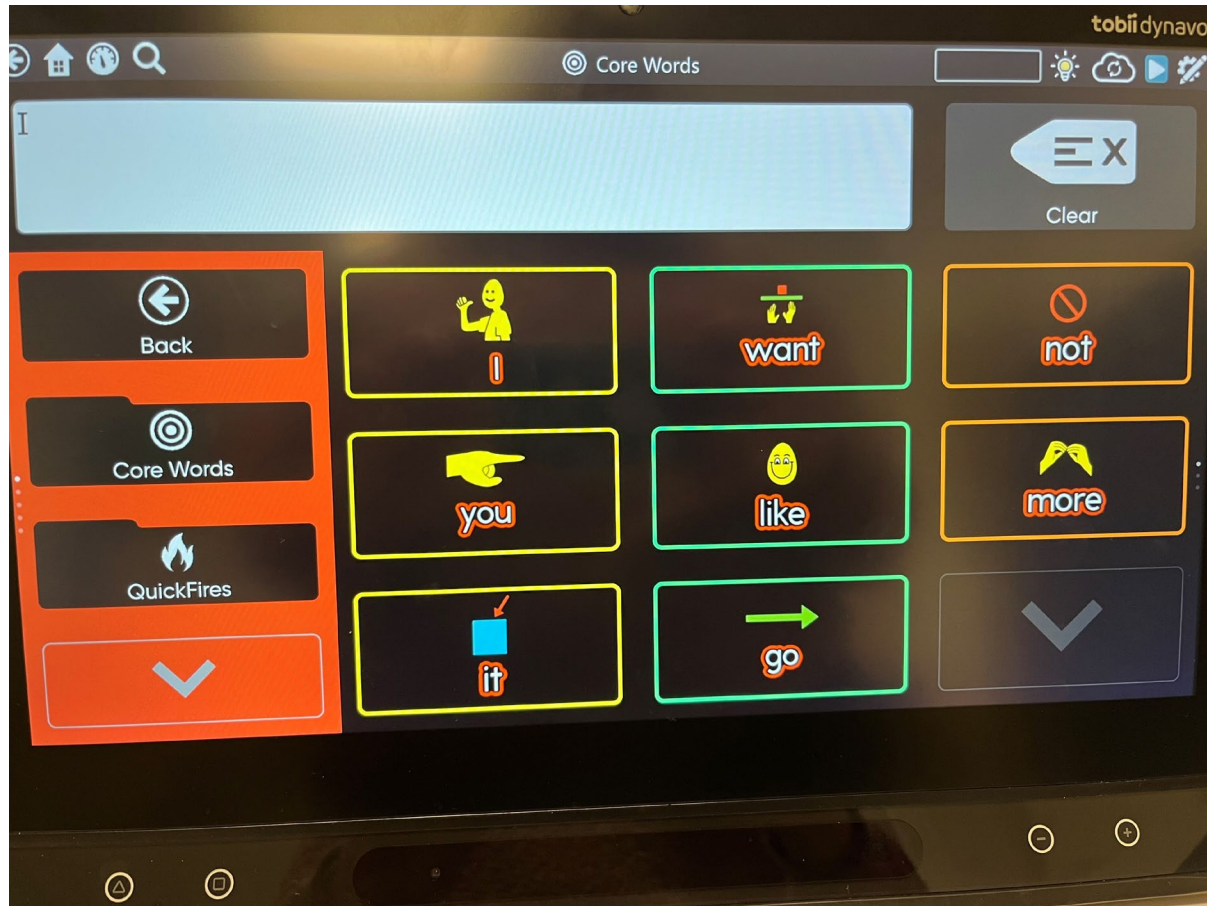

# Outlining in Color

- Pros?
- Cons?

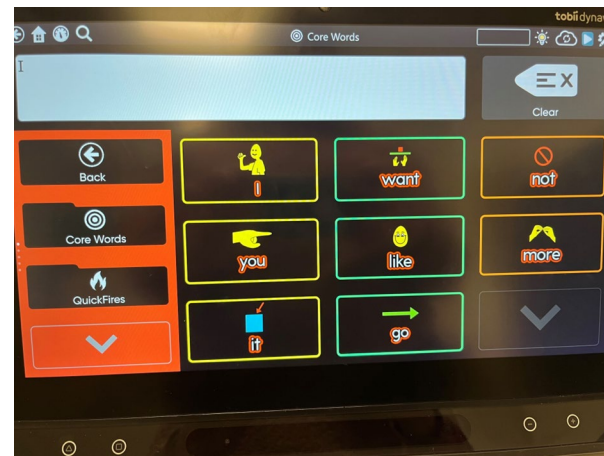

- Thoughts about adding colored borders?
- Can too many colors be too complex?

# Without Outline

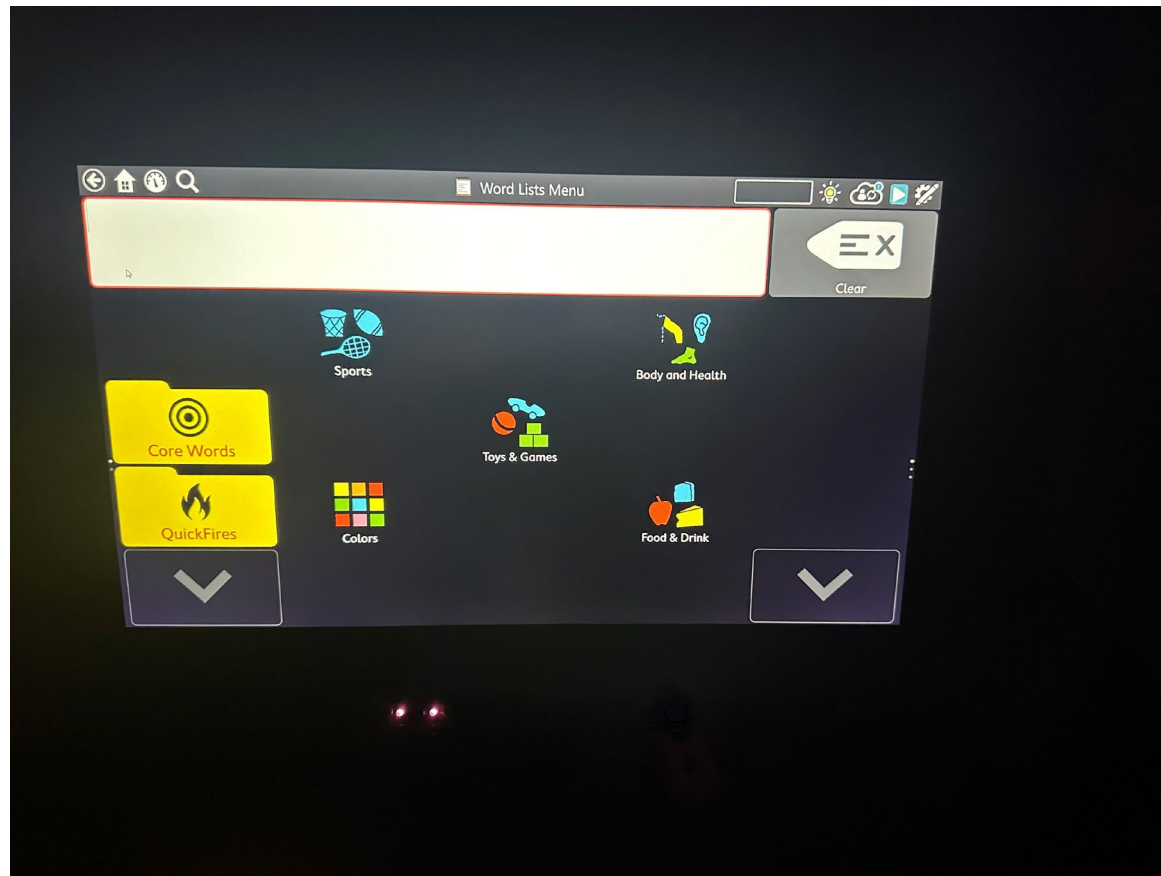

# No Outline

- Pros?
- Cons?

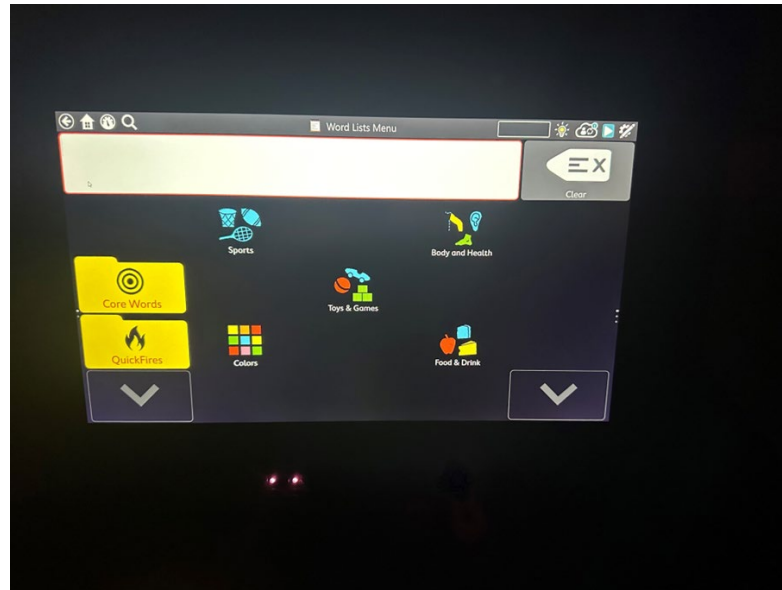

- Additional thoughts about outlining?

# Visual Feedback

- Visual supports such as cursors and highlighting are used in eye gaze displays
- Think about the pros and cons of each of these feedback methods

# Cursors

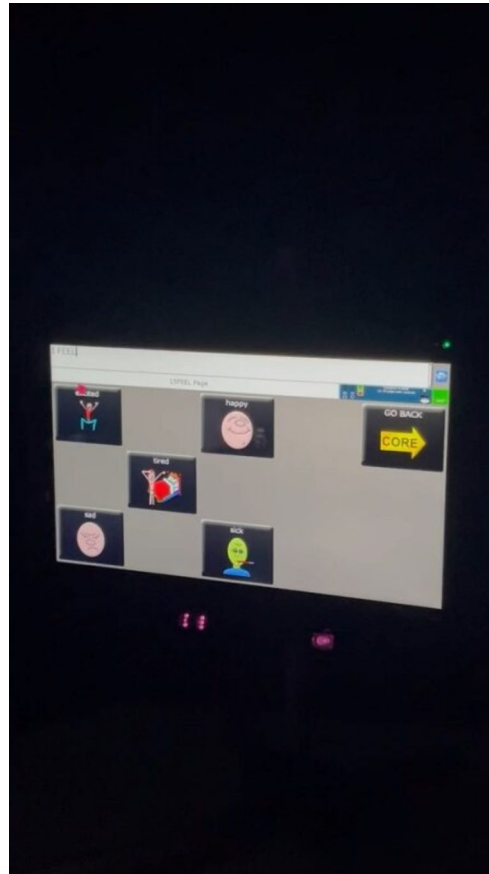

# Cursor and Highlighting

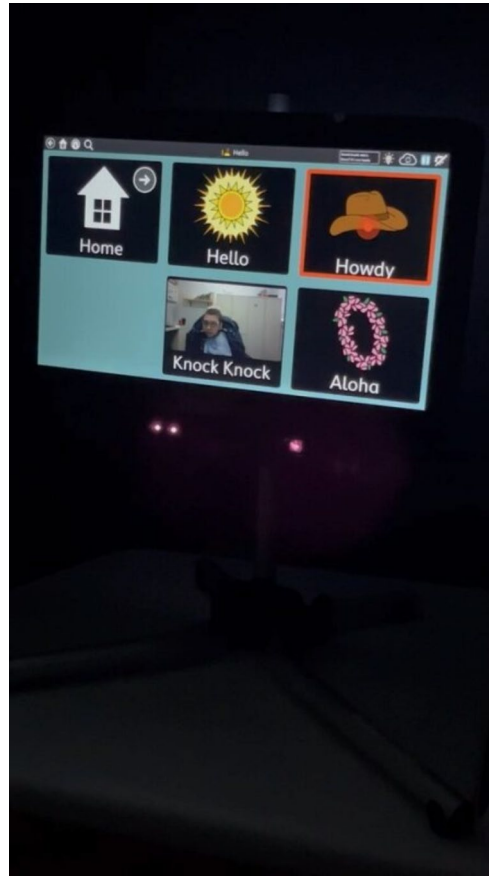



# Feedback

- Pros and Cons of:
    - Cursors
    - Highlighting
    - Combination of Cursor & Highlighting
  - Thoughts about movement on the screen?
    - Distracting?
  - Color preferences for cursors or highlight?
    - Favorite colors? How to choose colors?
-

# Eye Gaze Games

- Use simple games to help users gain skills in using eye gaze as a selection method
- Consider the pros and cons of the examples provided

# Eye Gaze Games

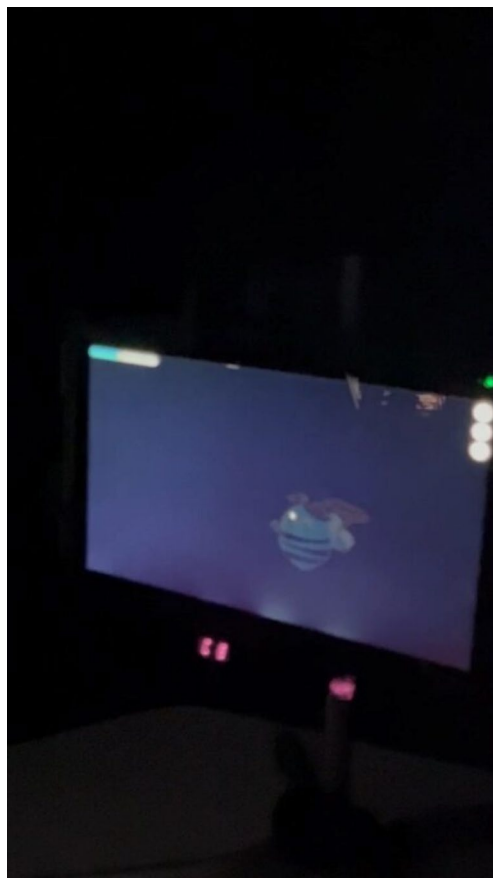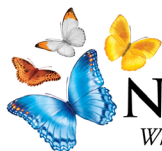

**NATIONWIDE CHILDREN'S**  
*When your child needs a hospital, everything matters.™*

# Eye Gaze Games

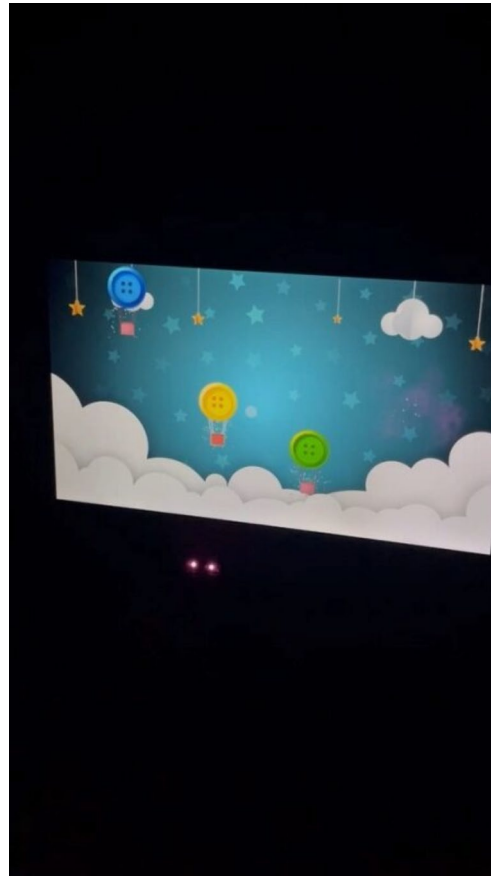

**NATIONWIDE CHILDREN'S**  
*When your child needs a hospital, everything matters.™*

# Eye Gaze Games

- Pros and Cons of Games
- Complexity of a Game
  - Need to consider this aspect?
  - Simple interfaces better?
  - Movement component in a game?
- Sound effects in Games as well?
- Can there be too much stimuli?

# Additional Components to Consider

- Symbol size and how this aligns with child's skills in accessing vocabulary?
- Thoughts about eye gaze as an access method?
- Strategies given to families/caregivers to support vision?
  - Common recommendations?
  - How can these be used with AAC?

# Feedback

- Can you provide TOO much?
- Balance between helpful vs. distracting?
- Highlighting functions?

# Additional Accommodations

- Thoughts about Motion?
  - Feedback options
- Environmental arrangement?
  - Dark Rooms
  - Limited distractions



# Questions

- What needs to be considered in AAC interfaces?
- What do SLPs need to watch for when introducing an AAC interface to a child with CVI?
- Final thoughts to share?
