# Supplementary material
Source: publisher figshare collection journal article supplement (https://asha.figshare.com/articles/dataset/_/28279184)
Supplement: Supplementary file 2 [file 1]

### Supplemental Material S3. Codebook: The list of codes used for the current study.

#### Codebook with Operational Definitions

| Theme                   | Operational Definition                                                                                                                                                                                                                                                |
|-------------------------|-----------------------------------------------------------------------------------------------------------------------------------------------------------------------------------------------------------------------------------------------------------------------|
| Background              | Discusses the background color of the AAC interface, symbol, or environment.                                                                                                                                                                                          |
| Grid Size               | Discusses the size of an array, the number of symbols available, or the number of concepts presented as part of the AAC interface.                                                                                                                                    |
| High Contrast           | References the use of contrast between background and symbols on the AAC interface. Refers to the use of high contrasting images within symbols and how high contrast representations are created or presented to the child with CVI.                                 |
| Movement                | References the use of movement on the AAC interface or in the environment.                                                                                                                                                                                            |
| Outline and Spacing     | Discusses the use of outlines including borders or highlighting around an icon within an AAC interface. Considers the space between icons presented on the AAC interface.                                                                                             |
| Preferred Colors        | References the use of preferred colors specific to an individual with CVI. May discuss as a preferred color or anchor color.                                                                                                                                          |
| Roman Word Bubbling     | Use of outlining of words, phrases, or sentences. Specific use of the Roman Word Bubbling technique to highlight text for children with CVI.                                                                                                                          |
| Scaffolding             | Discusses the building of skills or progressive nature of moving from different forms of symbolic representation. Acknowledges that skills may be built over time and that changes may be made as an individual progresses in knowledge and understanding of symbols. |
| Symbolic Representation | References to the design of picture communication symbols themselves and how concepts are represented either with tangible items, real photographs, or line drawings. Discusses how a concept is represented to a child with CVI.                                     |
| Visual Field Preference | References to the visual field preferences observed when working with a child with CVI.                                                                                                                                                                               |
