# Supplementary material
Source: publisher figshare collection journal article supplement (https://asha.figshare.com/articles/dataset/_/28279184)
Supplement: Supplementary file 3 [file 1]

## **Supplemental Material S2.** Interview guide: The list of questions asked to study participants.

### CVI Focus Group Interview Guide

#### Presentation of Current Accommodations to AAC Interfaces (visual examples for each)

- Roman Bubble Letters
  - What do you think of this accommodation?
  - How supportive is this accommodation?
  - Why is this supportive or why is this not supportive?
- Types of Photographs/Symbols/Drawings
  - What are your thoughts about what type of symbol is most supportive?
  - Benefits and drawbacks of real photographs?
  - Benefits and drawbacks of line drawings or symbols?
- Black Background
  - What do you think of this accommodation?
  - How supportive is this accommodation?
  - Why is this supportive or why is this not supportive?
  - Background color as well as button background. What are your thoughts?
- Reduced Grid Sizes
  - What do you think of this accommodation?
  - How supportive is this accommodation?
  - Why is this supportive or why is this not supportive?
- High Contrast Symbols
  - What do you think of this accommodation?
  - How supportive is this accommodation?
  - Why is this supportive or why is this not supportive?
- Red, Green, Yellow, outline
  - What do you think of this accommodation?
  - How supportive is this accommodation?
  - Why is this supportive or why is this not supportive?
- Exploration of possible future accommodations
  - Addition of Motion with Symbols
    - How supportive would this accommodation be?
    - Why would or wouldn't this accommodation be supportive?
    - Considerations for development of this accommodation?
  - Considerations for scanning interfaces/BCI
    - How can we adjust/change how item highlighting works to help children with CVI?
  - Considerations for VSDs
    - How can we adjust/change VSDs to help children with CVI?
  - Feedback options?
    - How much is too much?
    - Balancing what is helpful versus what's distracting.

- Zoom functions?
- Highlight functions.
- Positioning of the device and how we might tailor this to children's needs?
  - Vantage point and considering what the child sees.
  - Including people in these scenes?
- What additional accommodations may be supportive for children with CVI?
- Do you have any ideas to share about how we could improve future interfaces?
- Presentation of List of CVI Characteristics
  - Which need to be considered in designing AAC interfaces, does a hierarchy exist or does this vary based on a child's presentation ?
  - What do SLPs need to watch for when introducing an AAC interface to a child with CVI?
- Any final thoughts about AAC for children with CVI?
